# Supplementary material for: Hygroscopic growth characteristics of anthropogenic aerosols over central China revealed by lidar observations
Source: Copernicus journal article supplement (doi:10.5194/egusphere-2025-4965), 2025-10-16
Supplement: Supplementary file [file egusphere-2025-4965-AC2-supplement.pdf]

# Responses to RC1

## General Remarks

This manuscript presents a valuable long-term study of aerosol hygroscopicity in Wuhan, Central China, utilizing a 15-year dataset of ground-based polarization lidar observations. The authors successfully identify 192 cases of hygroscopic growth and provide a detailed statistical analysis of the hygroscopic growth parameter, exploring its inter-annual trends, seasonal variations, and vertical distribution. The contribution of this work is significant. Long-term, vertically resolved datasets of aerosol hygroscopicity are rare, and this study offers critical insights into how emission control policies, specifically the shifting ratio of NO<sub>2</sub> to SO<sub>2</sub>, may be altering the optical properties of urban aerosols over time. The approach of combining lidar with radiosonde and reanalysis data is sound, and the manuscript is generally well-structured and clear. However, to ensure the robustness of the retrieved optical properties and the subsequent hygroscopic parameters, I have a few specific concerns regarding the retrieval assumptions and aerosol classification methods. Addressing the following points would strengthen the physical interpretation of the results. I hope my comments can be helpful in refining this interesting study.

**Response:** We appreciate your thoughtful review and valuable comments on our manuscript. We have added the specific depolarization ratio used to separate dust and non-dust components and discussed the potential interference from internally mixed dust. In addition, a sensitivity analysis have been conducted to assess how variability in lidar ratio affects the derived hygroscopic growth parameter. Point-by-point responses are provided below, and the manuscript has been revised accordingly.

## Specific comments

**Comment:** The study utilizes the POLIPHON method to separate dust and non-dust (anthropogenic) components. However, the manuscript does not explicitly state the specific particle depolarization ratios for pure dust and non-dust used for this separation. Since the derived non-dust backscatter coefficient is highly sensitive to these threshold values, please explicitly list them in the methodology section.

**Response:** Thank you very much for your suggestion. We have added statements specifying the particle depolarization ratios used to separate dust and non-dust compnents. The following sentences have been added in the revised manuscript “**In addition, the non-dust particle backscatter coefficient  $\beta_{nd}$  is calculated using the polarization-lidar photometer networking (POLIPHON) method as follows (Teschke et al., 2009; Mamouri and Ansmann, 2014):**

$$\beta_{nd}(z) = \beta_p(z) - \beta_p(z) \frac{[\delta_p(z) - \delta_{nd}](1 + \delta_d)}{(\delta_d - \delta_{nd})[1 + \delta_p(z)]} \quad (1)$$

where  $z$  represents the altitude;  $\delta_d = 0.31$  and  $\delta_{nd} = 0.05$  are the particle depolarization ratios for dust and non-dust, respectively. For each profile, we set  $\beta_{nd}(z) = \beta_p(z)$  if  $\delta_p(z) < \delta_{nd}$  and  $\beta_{nd}(z) = 0$  if  $\delta_p(z) > \delta_d$  (Mamouri and Ansmann, 2014).” (please see lines 111-117) The values of  $\delta_d = 0.31$  and  $\delta_{nd} = 0.05$  are summarized from previous lidar observations in East Asia (Sugimoto et al., 2003; Shimizu et al., 2004). Moreover, laboratory studies by Sakai et al. (2010) estimated the particles depolarization ratio of 0.39 for coarse-mode particles and 0.17 for fine-mode particles for Asian dust, which are consistent with observational results when assuming a 25% contribution from fine-mode dust.

**Comment:** The methodology assumes that dust and non-dust aerosols are externally mixed. In a humid environment like Wuhan, it is common for dust particles to become internally mixed (e.g., coated) with soluble pollutants during transport. This coating process typically lowers the particle depolarization ratio of the dust. Could the POLIPHON method be misclassifying these "coated dust" particles as "anthropogenic" due to their

reduced depolarization? If misclassification occurs, the "non-dust" component would be contaminated by less hygroscopic dust cores. Could this artificially lower the reported hygroscopicity of the anthropogenic component? A brief discussion on this potential contamination and its impact on the final statistics would be very helpful.

**Response:** Thank you very much for pointing this out. You are correct that the POLIPHON method does not account for internal mixing situations, which may lead to the misclassification of “coated dust” particles as “anthropogenic”. However, this potential misclassification does not significantly affect our results for the following reasons.

First, Fig. 1R(a) shows the dust intrusion conditions of the 192 analyzed cases. Approximately 54.7% of the cases show no dust interference, and for the remaining cases the dust optical depth (DOD) does not exceed 0.05. This is consistent with our findings that most hygroscopic growth cases are identified in summer and autumn (accounting for 83.5% of all cases), when Wuhan is least affected by dust intrusions and typically exhibits low DOD values (Jing et al., 2024).

Second, to estimate the potential influence of internally mixed dust, we conducted a sensitivity analysis. Given that the  $\delta_p$  during dust events over Wuhan varies between 0.1 and 0.3 (Jing et al., 2024), we reduced the threshold value for pure dust  $\delta_d$  (as defined in the response above) to lower values of 0.10~0.25, thereby making the extraction of "anthropogenic aerosols" more conservative. Figure 1R(b) shows the derived hygroscopic parameter  $\gamma$  using different  $\delta_d$  values. Even when  $\delta_d$  is reduced to 0.10,  $\gamma$  for all cases changes only marginally, increasing by 0.02 (0.62 to 0.64).

In summary, although the misclassification of internally mixed dust could slightly lower the estimated hygroscopicity of the anthropogenic component, it does not have a significant impact on the conclusions in the study. The corresponding discussions have been added to the revised manuscript. (please see lines 248-255)

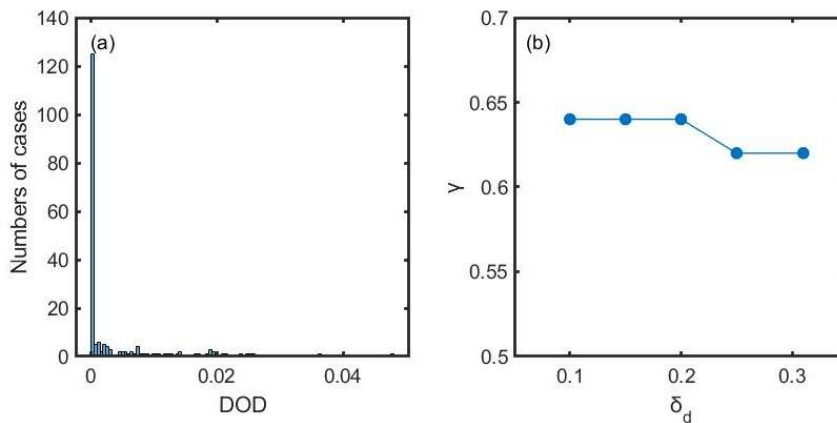

**Figure 1R. (a)Histogram of DOD for the 192 analyzed cases; (b) hygroscopic parameter  $\gamma$  at different threshold  $\delta_d$  values.**

**Comment:** The particle backscatter coefficient is retrieved using a fixed lidar ratio of 50 sr. This assumption requires further elaboration. As aerosols absorb water and grow, their microphysical properties (size distribution, refractive index, shape) change, which typically causes the lidar ratio to vary rather than remain constant. Please discuss or quantify the potential error introduced by holding this value fixed during humidification events. A simple sensitivity analysis showing how a varying lidar ratio affects the calculated hygroscopic growth parameter would improve the robustness of the conclusions.

**Response:** In light of the reviewer’s comments, we have added a sensitivity analysis as follows. Since polarization lidar cannot directly retrieve the lidar ratio (LR), we adopt the LR-RH (relative humidity) relationship reported by Zhao et al. (2017):

$$LR = LR_{dry} \times (0.92 + 2.5 \times 10^{-2}(RH - 40) - 1.3 \times 10^{-3}(RH - 40)^2 + 2.2 \times 10^{-5}(RH - 40)^3) \quad (2)$$

where  $LR_{dry}$  represents the LR under dry conditions. The fixed LR of 50 sr represents an average value derived from combined lidar and sun photometer measurements in the ambient troposphere (Takamura et al., 1994). Considering that the average RH in the lower troposphere over Wuhan is approximately 40~70% based on radiosonde measurements (Guo et al., 2023), we set  $LR_{dry}=47$  sr in Eq. (2), such that an LR of 50 sr corresponds to RH values of approximately 50~55%. It should be mentioned that our analysis focuses on the variation of LR within the identified particle-hygroscopic-growth layers. Taking the case presented in Section 3 as an example, LR varies with RH within the identified layer (between the two horizontal dashed lines in Figure 2R(a)). The revised backscatter coefficient (red curve) shows only a slight deviation from the original values obtained using a fixed LR (black curve in Figure 2R(b)). As a result, the hygroscopic growth  $\gamma$  increases by 2.1% from 0.48 to 0.49 (Figure 2R(c)).

Furthermore, Table 1R summarizes 10 cases spanning RH ranges from 40% to 100%. Overall,  $\gamma$  increases by up to 12.5% when using a variable LR instead of a fixed value. The uncertainty introduced by assuming a fixed LR becomes more pronounced under higher RH conditions. This sensitivity analysis and the corresponding discussions have also been added to the revised manuscript. (please see lines 330-354)

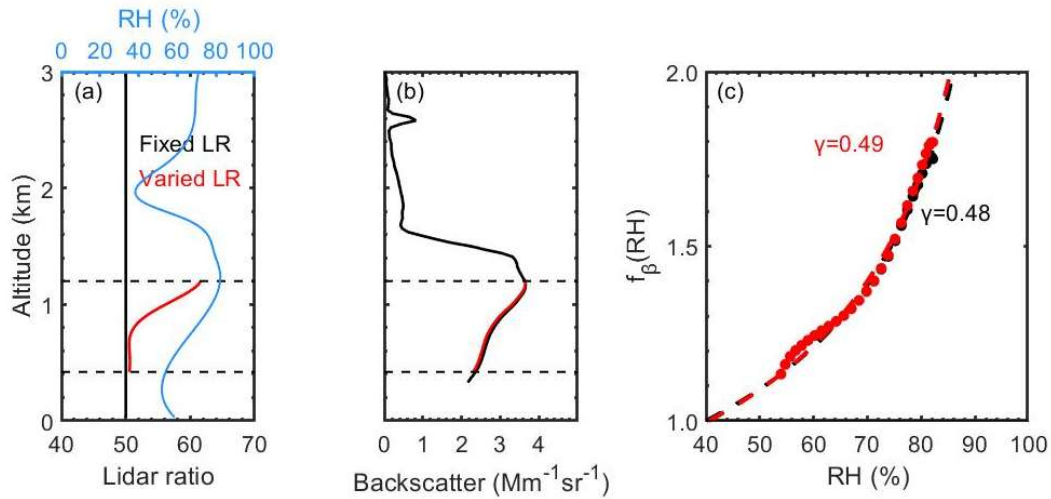

**Figure 2R.** A case to illustrate the difference of hygroscopic parameter  $\gamma$  between using a fixed LR and a variable LR over Wuhan at 1830-1900 LT on 19 July 2019. Profiles of (a) lidar ratio and RH, (b) backscatter coefficient; (c) the particle backscatter coefficient enhancement factors calculated by the Hänel method are presented. The black and red lines represent profiles derived by a fixed LR of 50 sr and variable LR, respectively.

**Table 1R.** Comparisons of hygroscopic growth parameter  $\gamma$ : fixed LR versus variable LR.

| Date       | RH range | $\gamma_1$ by fixed LR | $\gamma_2$ by variable LR | $\frac{\gamma_2 - \gamma_1}{\gamma_1}$ |
|------------|----------|------------------------|---------------------------|----------------------------------------|
| 2013.07.09 | 71~84 %  | 0.42                   | 0.46                      | 9.5 %                                  |
| 2018.08.21 | 84~95 %  | 0.48                   | 0.54                      | 12.5 %                                 |
| 2018.10.17 | 65~80 %  | 0.53                   | 0.56                      | 5.7 %                                  |
| 2019.07.19 | 54~82 %  | 0.48                   | 0.49                      | 2.1 %                                  |
| 2019.08.09 | 72~96 %  | 0.45                   | 0.50                      | 11.1 %                                 |
| 2020.08.15 | 72~89 %  | 0.37                   | 0.41                      | 10.8 %                                 |
| 2021.10.03 | 42~58 %  | 0.70                   | 0.72                      | 2.9 %                                  |
| 2022.10.01 | 68~89 %  | 0.63                   | 0.66                      | 4.8%                                   |
| 2022.11.10 | 53~68 %  | 0.22                   | 0.22                      | 0 %                                    |
| 2024.01.04 | 59~77 %  | 0.49                   | 0.53                      | 8.2 %                                  |

---

## References:

- Guo, X., Huang, K., Fang, J., Zhang, Z., Cao, R., and Yi, F.: Seasonal and Diurnal Changes of Air Temperature and Water Vapor Observed with a Microwave Radiometer in Wuhan, China, *Remote Sens.*, 15, 5422, <https://doi.org/10.3390/rs15225422>, 2023.
- Jing, D., He, Y., Yin, Z., Liu, F., and Yi, F.: Long-term characteristics of dust aerosols over central China from 2010 to 2020 observed with polarization lidar. *Atmos. Res.*, 297, 107129, <https://doi.org/10.1016/j.atmosres.2023.107129>, 2024.
- Mamouri, R. E. and Ansmann, A.: Fine and coarse dust separation with polarization lidar, *Atmos. Meas. Tech.*, 7, 3717–3735, <https://doi.org/10.5194/amt-7-3717-2014>, 2014.
- Sakai, T., Nagai, T., Zaizen, Y., and Mano, Y.: Backscattering linear depolarization ratio measurements of mineral, sea-salt, and ammonium sulfate particles simulated in a laboratory chamber, *Appl. Optics*, 49, 4441–4449, <https://doi.org/10.1364/AO.49.004441>, 2010.
- Shimizu, A., Sugimoto, N., Matsui, I., Arao, K., Uno, I., Murayama, T., Kagawa, N., Aoki, K., Uchiyama, A., and Yamazaki, A.: Continuous observations of Asian dust and other aerosols by polarization lidars in China and Japan during ACE-Asia, *J. Geophys. Res.*, 109, D19S17, <https://doi.org/10.1029/2002JD003253>, 2004.
- Sugimoto, N., Uno, I., Nishikawa, M., Shimizu, A., Matsui, I., Dong, X., Chen, Y., and Quan, H.: Record heavy Asian dust in Beijing in 2002: Observations and model analysis of recent events, *Geophys. Res. Lett.*, 30, 1640, <https://doi.org/10.1029/2002GL016349>, 2003.
- Takamura, T., Sasano, Y., and Hayasaka, T.: Tropospheric aerosol optical properties derived from lidar, sun photometer, and optical particle counter measurements, *Appl. Opt.*, 33, 7132–7140, <https://doi.org/10.1364/AO.33.007132>, 1994.
- Tesche, M., Ansmann, A., Müller, D., Althausen, D., Engelmann, R., Freudenthaler, V., and Groß, S.: Vertically resolved separation of dust and smoke over Cape Verde using multiwavelength Raman and polarization lidars during Saharan mineral dust experiment 2008, *J. Geophys. Res.*, 114, D13202, <https://doi.org/10.1029/2009JD011862>, 2009.
- Zhao, G., Zhao, C., Kuang, Y., Tao, J., Tan, W., Bian, Y., Li, J., and Li, C.: Impact of aerosol hygroscopic growth on retrieving aerosol extinction coefficient profiles from elastic-backscatter lidar signals, *Atmos. Chem. Phys.*, 17, 12133–12143, <https://doi.org/10.5194/acp-17-12133-2017>, 2017.
